# Supplementary material
Source: PubMed Central journal article supplement (PMC4111228)

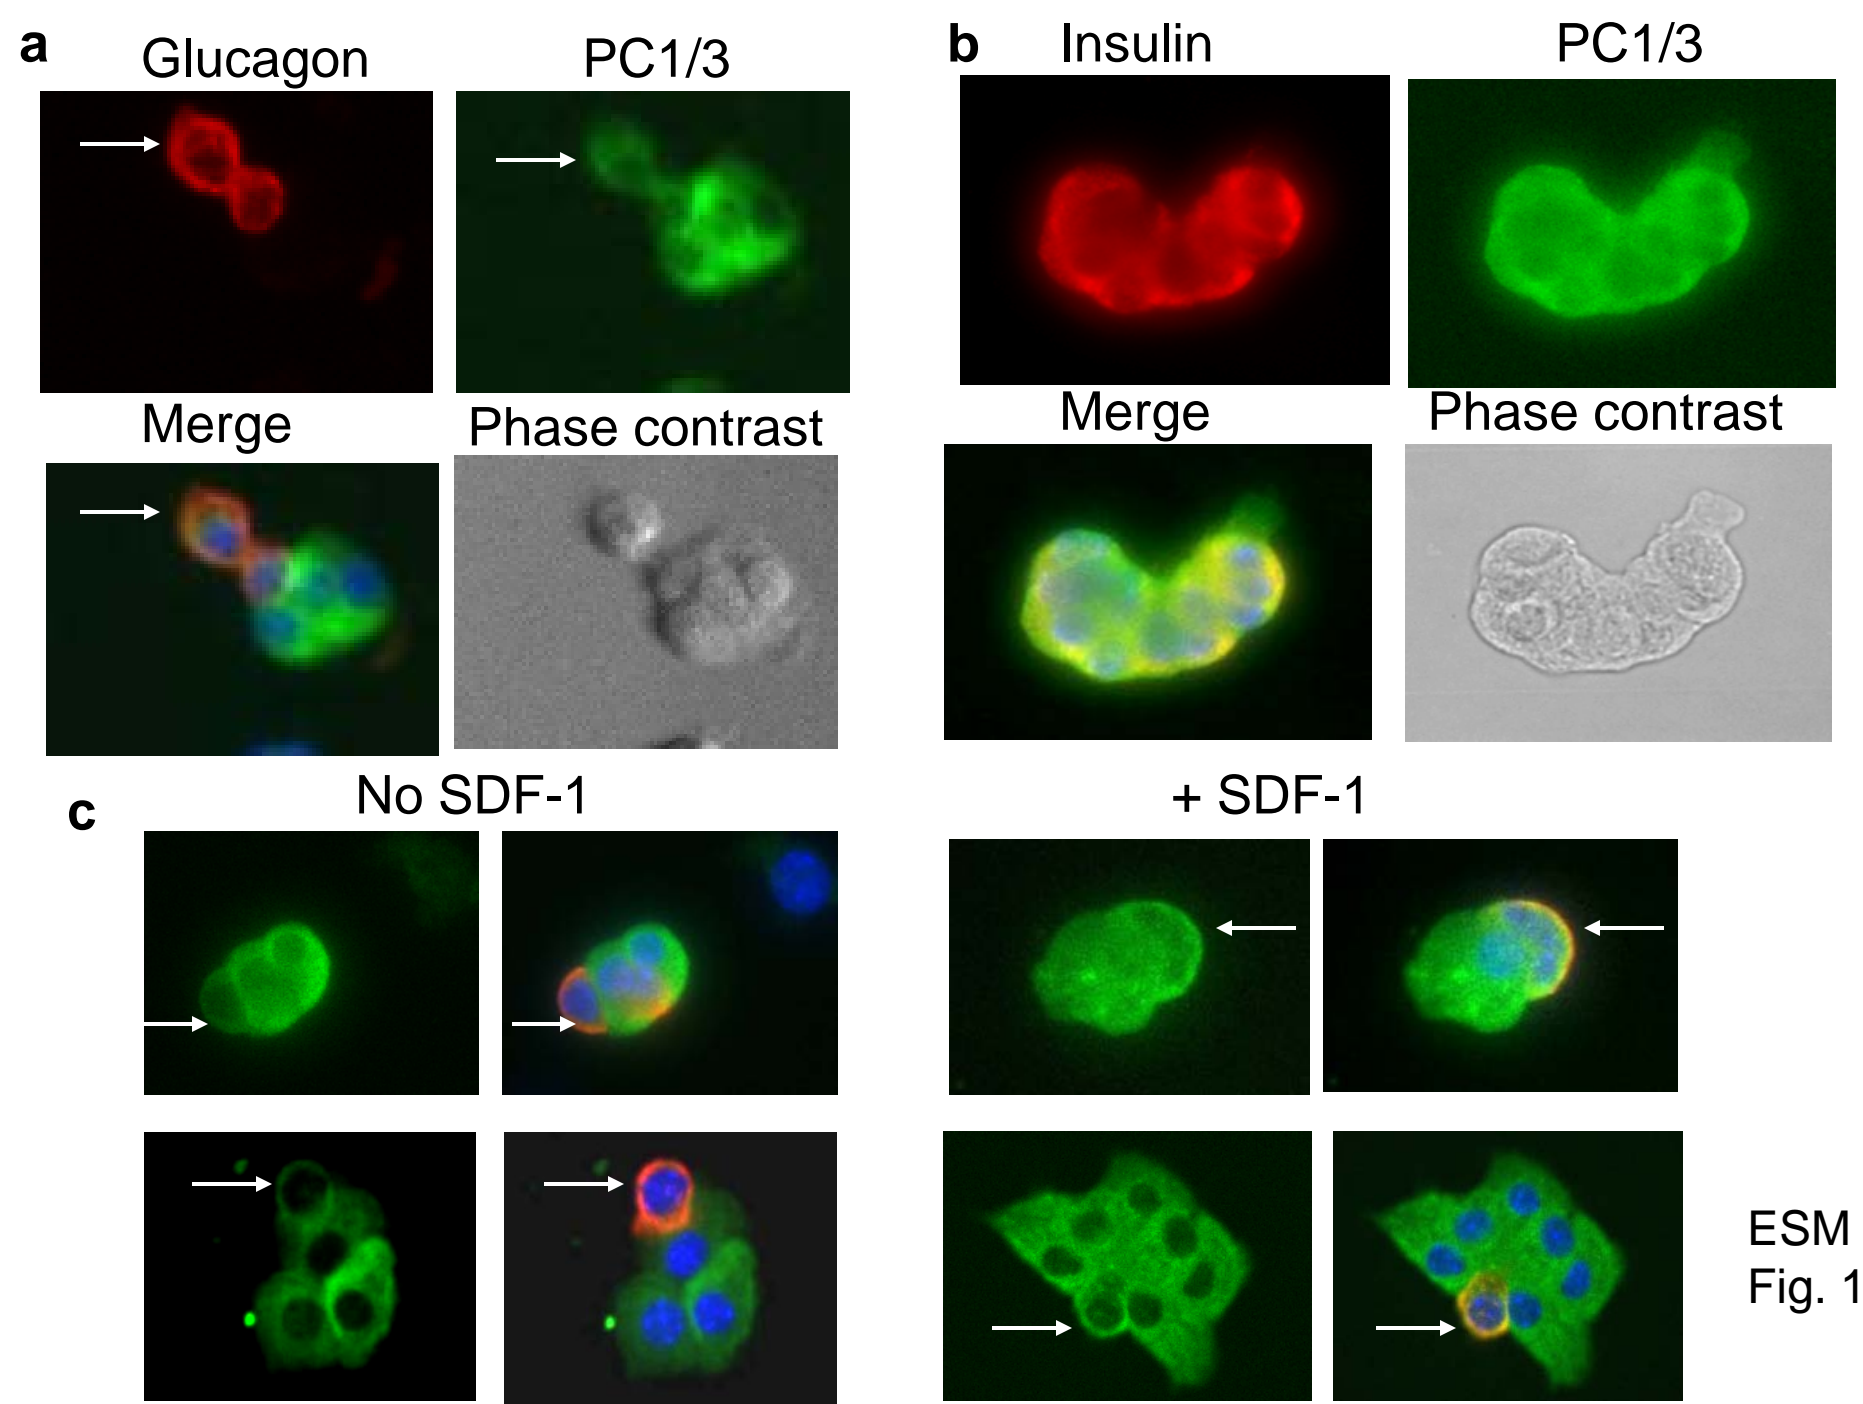

Supplement: NIHMS596247-supplement-Suppl_Fig1_Liu_StromCell.pdf [file NIHMS596247-supplement-Suppl_Fig1_Liu_StromCell.pdf]
